# Supplementary material for: Influence of Karst Reservoir Capacity on Flood in Lijiang Basin Based on Modified HEC-HMS through Soil Moisture Accounting Loss
Source: MDPI journal article supplement (doi:10.3390/atmos13101544), 2022-09-21
Supplement: s1 [file s1]

Archive with 1 entries (1 files):
- atmosphere-1873996-supplementary.pdf
