# Supplementary material for: Influence of Karst Reservoir Capacity on Flood in Lijiang Basin Based on Modified HEC-HMS through Soil Moisture Accounting Loss
Source: MDPI journal article supplement (doi:10.3390/atmos13101544), 2022-09-21
Supplement: s1 [file s1 › atmosphere-1873996-supplementary.pdf]

# Influence of Karst Reservoir Capacity on Flood in Lijiang Basin Based on Modified HEC-HMS through Soil Moisture Accounting Loss

Junfeng Dai <sup>1,2</sup>, Saeed Rad <sup>3,\*</sup>, Jingxuan Xu <sup>4,\*\*</sup>, Zupeng Wan <sup>3</sup>, Zitao Li <sup>3</sup>, Linyan Pan <sup>5</sup>, and Asfandiyar Shahab <sup>3</sup>

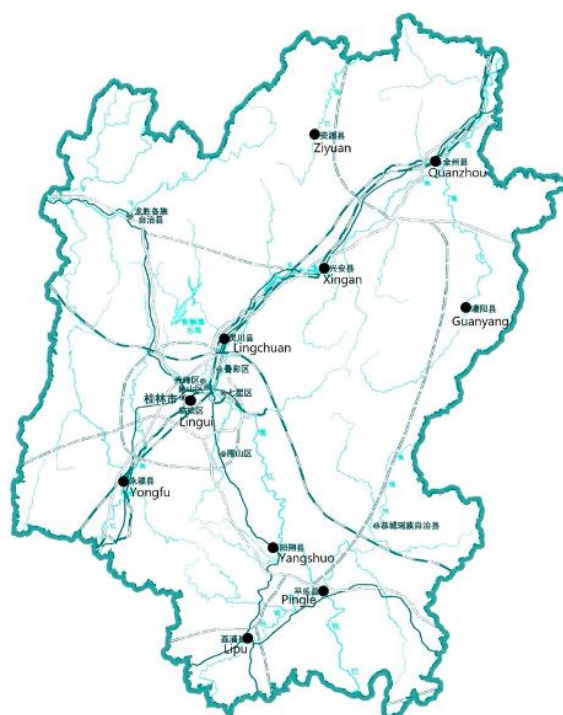

**Figure S1.** Locations of the collected soil moisture data across the watershed.

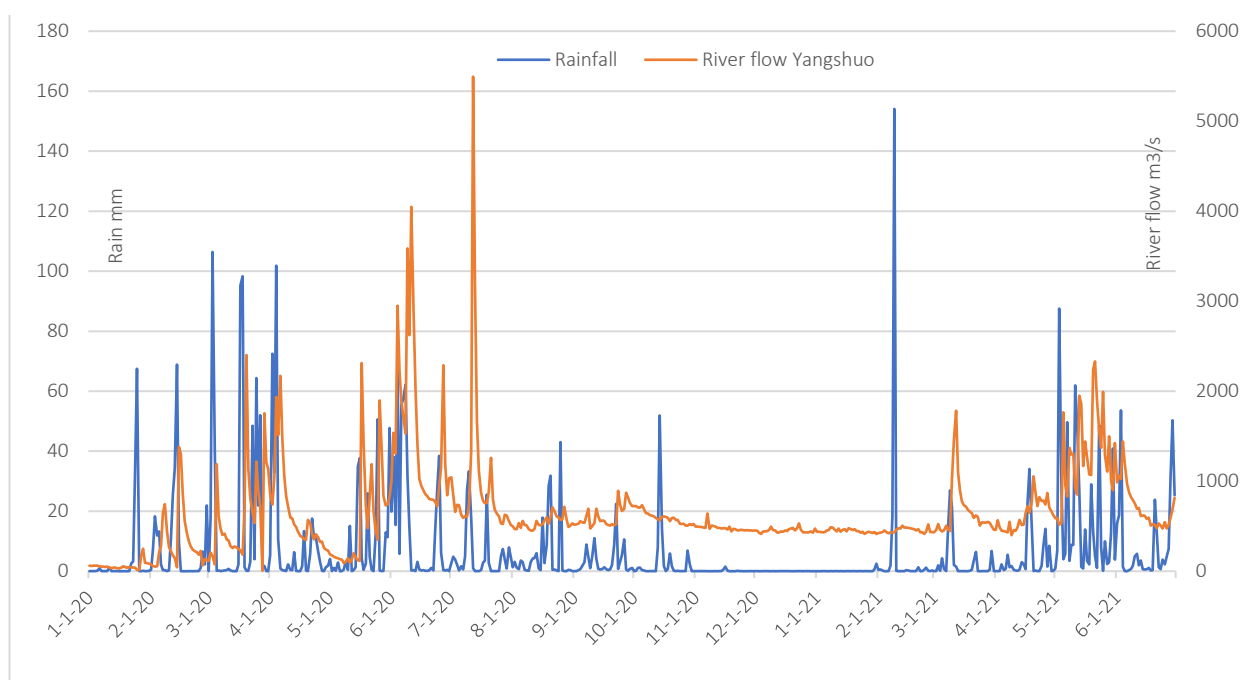

**Figure S2.** River flow fluctuations in response to the soil moisture accounting loss and precipitation at Yangshuo subbasin.

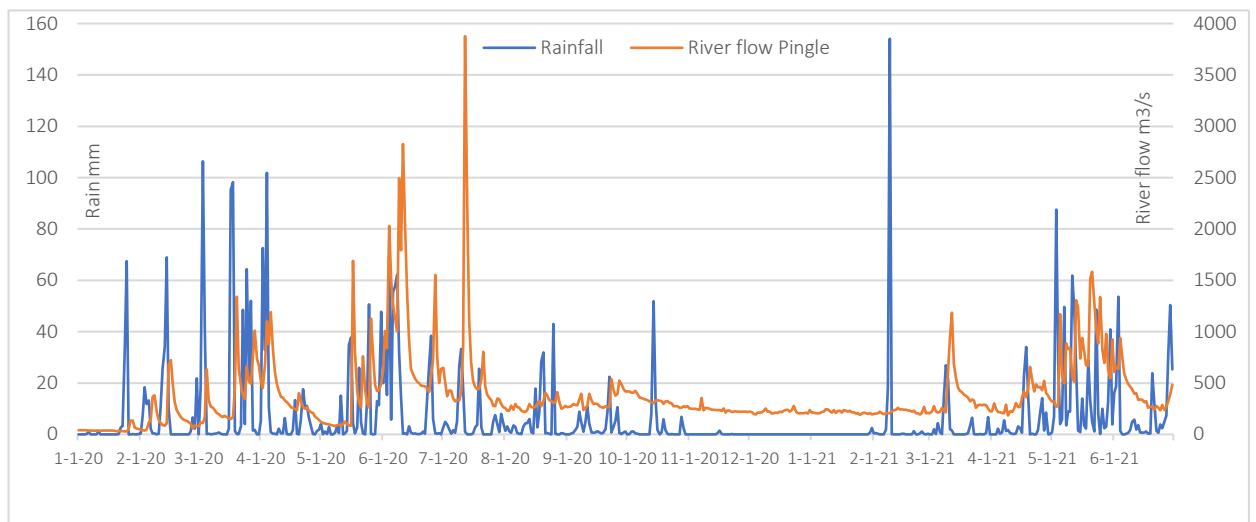

**Figure S3.** River flow fluctuations in response to the soil moisture accounting loss and precipitation at Pingle subbasin.
